# Supplementary material
Source: PubMed Central journal article supplement (PMC3703919)
Supplement: NIHMS476327-supplement-Supp_tables.pdf [file NIHMS476327-supplement-Supp_tables.pdf]

Supplemental Data Table 1. Mean derived pharmacokinetic estimates for Ang-(1-7) by cohort on Day 1

| Dose (mcg/kg) | $t_{1/2}$ | AUC       | $C_{max}$ |
|---------------|-----------|-----------|-----------|
| 100           | 10.44     | 28,376.9  | 20,202.0  |
| 200           | 0.42      | 13,354.4  | 10,262.3  |
| 400           | 0.61      | 19,456.5  | 13,391.5  |
| 700           | 0.42      | 255,846.8 | 147,462.7 |

Supplemental Data Table 2. Mean derived pharmacokinetic estimates for Ang-(1-7) by cohort on Day 5

| Dose (mcg/kg) | $t_{1/2}$ | AUC       | $C_{max}$ |
|---------------|-----------|-----------|-----------|
| 100           | 0.81      | 23,011.2  | 17,371.5  |
| 200           | 1.82      | 17,277.3  | 11,207.4  |
| 400           | 0.66      | 86,301.3  | 55,528.2  |
| 700           | 1.42      | 282,908.3 | 224,797.4 |
